# Supplementary material for: Thin-coated water soluble CdTeS alloyed quantum dots as energy donors for highly efficient FRET
Source: Royal Society of Chemistry journal article supplement (doi:10.1039/c4dt01502a), 2014-01-01
Supplement: c4dt01502a1.pdf [file c4dt01502a1.pdf]

## Supplementary Materials

### Water soluble thin coated CdTeS alloyed Quantum Dots for improved FRET applications

Akram Yahia-Ammar,<sup>†</sup> Aline M. Nonat<sup>\*,†</sup>, Anne Boos,<sup>‡</sup> Jean-Luc Rehspringer,<sup>§</sup> Zouhair Asfari,<sup>†</sup> and Loïc J. Charbonnière<sup>\*,†</sup>

<sup>†</sup> *Laboratoire d'Ingénierie Moléculaire Appliquée à l'Analyse, IPHC, UMR 7178 CNRS/UdS, ECPM, Bât R1N0, 25 rue Becquerel, 67087 Strasbourg Cedex 02, France*

<sup>‡</sup> *Laboratoire de Reconnaissance et Procédés de Séparation Moléculaire, IPHC, UMR 7178 CNRS/UdS, ECPM, Bât R1N0, 25 rue Becquerel, 67087 Strasbourg Cedex 02, France*

<sup>§</sup> *Département de Chimie et des Matériaux Inorganiques, IPCMS, UMR 7504, CNRS/UdS, 23 rue du Loess, BP 20, F-67037 Strasbourg, France*

*aline.nonat@unistra.fr, l.charbonn@unistra.fr*

### Table of content

|                                                                                                                                                                    |           |
|--------------------------------------------------------------------------------------------------------------------------------------------------------------------|-----------|
| <b>Figure S1:</b> Temporal evolution of the UV-Vis spectra and emission spectra upon refluxing at 100°C the reaction mixture in a 4:0.5:4 Cd:Te:GSH stoichiometry. | <b>S3</b> |
| <b>Figure S2:</b> Time-resolved luminescence decay profiles of <b>QD540</b> , <b>QD600</b> and <b>QD650</b> in 0.01 M TRIS-HCl pH 7.4.                             | <b>S4</b> |
| <b>Figure S3:</b> TEM image of <b>QD540</b> .                                                                                                                      | <b>S4</b> |
| <b>Figure S4:</b> Emission intensity of <b>QD540</b> in TRIS/HCl 0.01M, pH 7.3.                                                                                    | <b>S5</b> |
| <b>Figure S5:</b> Area covered by the GSH from a space filing MM2 model                                                                                            | <b>S6</b> |
| <b>Table S1:</b> Optical properties and structural parameters of CdTeS-GSH QDs at seven different reaction times.                                                  | <b>S7</b> |
| <b>Figure S6:</b> Emission spectra of quantum dots emitting at 636 nm before (blue) and after addition of GSH at room temperature (red, Citrate buffer, pH 8.5).   | <b>S8</b> |
| <b>Figure S7:</b> <sup>1</sup> H NMR spectrum of functionalized Nile-Red dyes.                                                                                     | <b>S8</b> |

|                                                                                                                                                                                                              |            |
|--------------------------------------------------------------------------------------------------------------------------------------------------------------------------------------------------------------|------------|
| <b>Calculation of the Dye/QD ratios of QD-NR1, QD-NR2, QD-NR3, QD-NR4, QD-NR5, and QD-NR6 from their UV-absorption spectra</b>                                                                               | <b>S9</b>  |
| <b>Table S2:</b> Factors <i>a</i> and <i>b</i> , and corresponding NR and QD concentrations and NR/QD ratios.                                                                                                | <b>S9</b>  |
| <b>Figure S8:</b> Experimental and calculated absorption spectra of Nile-red, <b>QD540</b> and for conjugated QDs with increasing dye/QD molar ratios.                                                       | <b>S10</b> |
| <b>Figure S9:</b> Normalized emission spectra of unconjugated QDs in absence of Nile-Red, after mixing with of 23 equivalents of Nile-Red and of conjugated QDs (NR/QD = 2.40, red), 0.01 M TRIS-HCl pH 7.4. | <b>S11</b> |
| <b>Figure S10:</b> Normalized emission spectra of <b>QD540</b> and after mixing with of 0, 0.5, 1.2 and 3 equivalents of Nile-Red in 0.01 M TRIS-HCl pH 7.4.                                                 | <b>S11</b> |
| <b>Background FRET theory and equations</b>                                                                                                                                                                  | <b>S12</b> |
| <b>Figure S11:</b> Time-resolved luminescence decay profiles of unconjugated and of conjugated QDs with increasing dye/QD molar ratios.                                                                      | <b>S13</b> |
| <b>Table S3:</b> Decay parameters for CdTe <sub>x</sub> S <sub>y</sub> QDs with increasing dye/QD molar ratios obtained from time-resolved studies in 0.01 M TRIS-HCl.                                       | <b>S13</b> |
| <b>Figure S12:</b> Emission spectra of unconjugated and of conjugated QDs with increasing dye/QD molar ratios, 0.01 M TRIS-HCl pH 7.4.                                                                       | <b>S14</b> |
| <b>Figure S13:</b> Space filling MM2 model of conjugated QD to one Nile-Red.                                                                                                                                 | <b>S14</b> |

a)

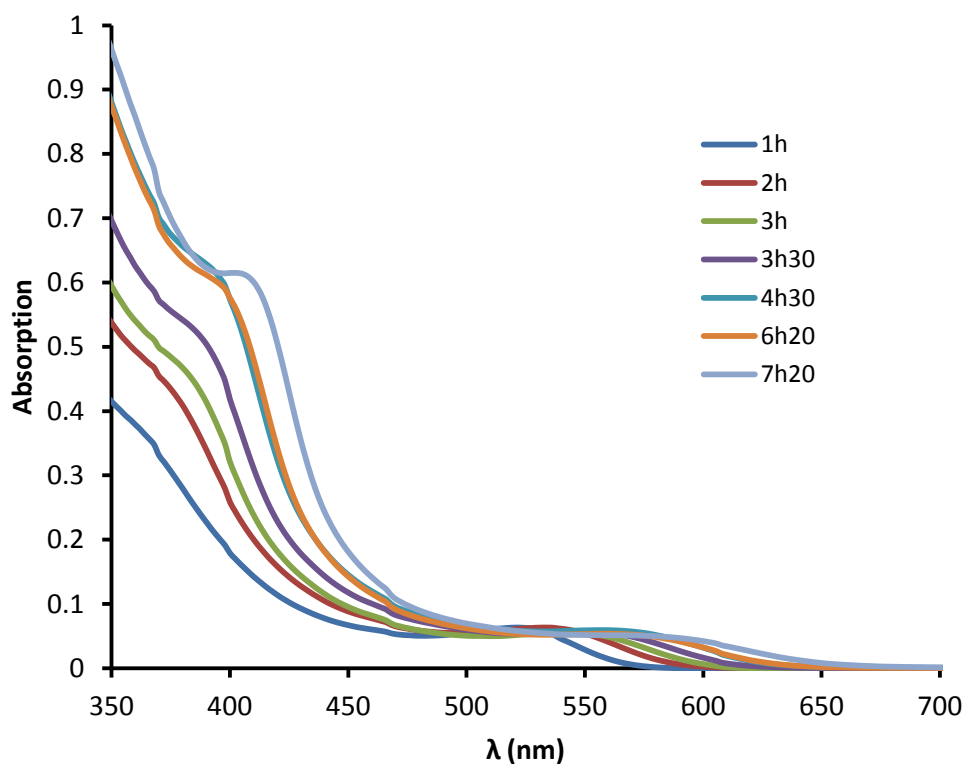

b)

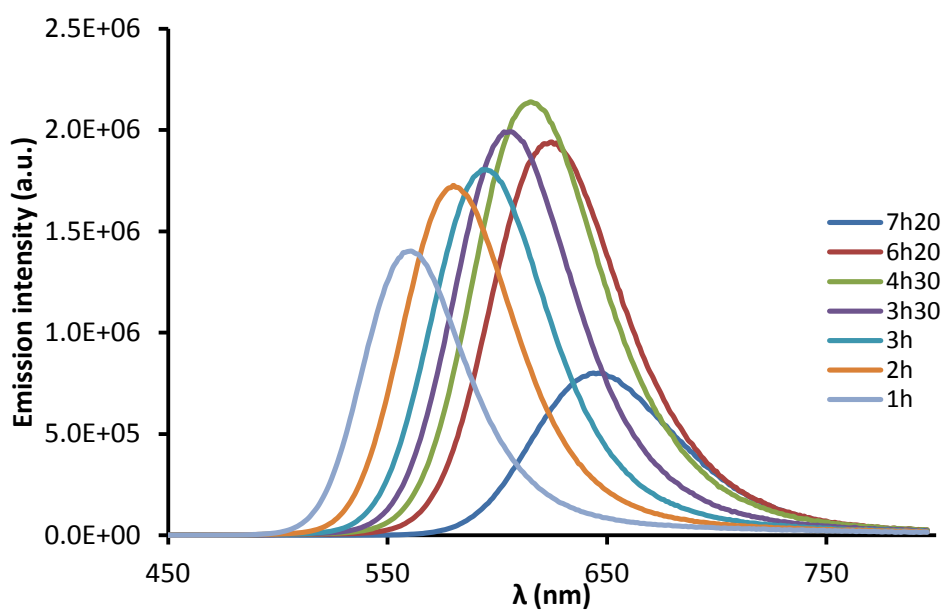

**Figure S1:** Temporal evolution of the UV-Vis spectra (a) and the corresponding emission spectra (upon excitation at 430 nm) (b) upon refluxing at 100°C the reaction mixture in a 4:0.5:4 Cd:Te:GSH stoichiometry.

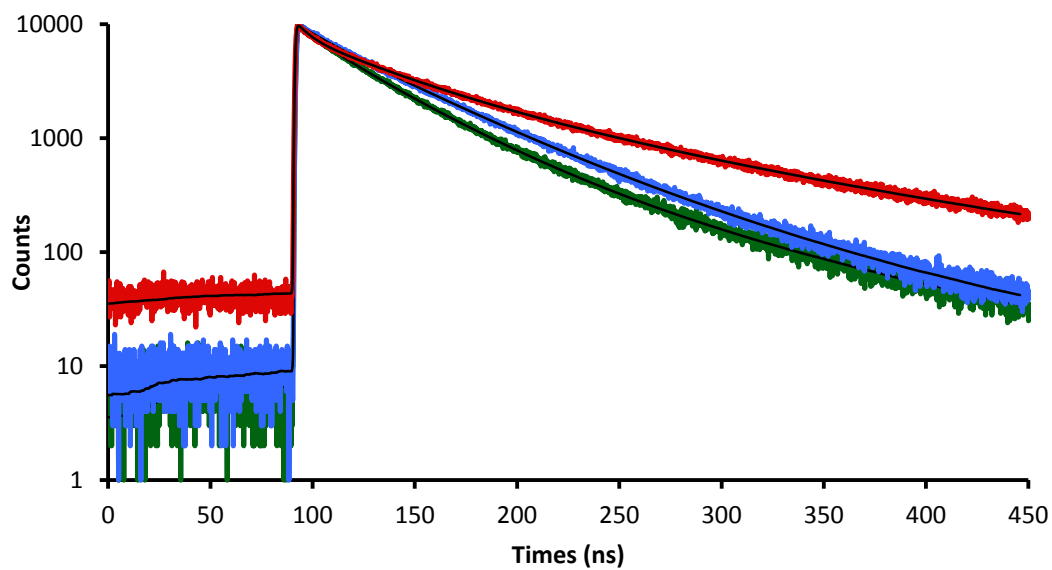

**Figure S2:** Time-resolved luminescence decay profiles of **QD540** (green), **QD600** (blue), **QD650** (red) in 0.01 M TRIS-HCl pH 7.4,  $\lambda_{\text{ex}} = 370$  nm and  $\lambda_{\text{em}} = 550$  nm and the corresponding fitting according to the values given in the text (back).

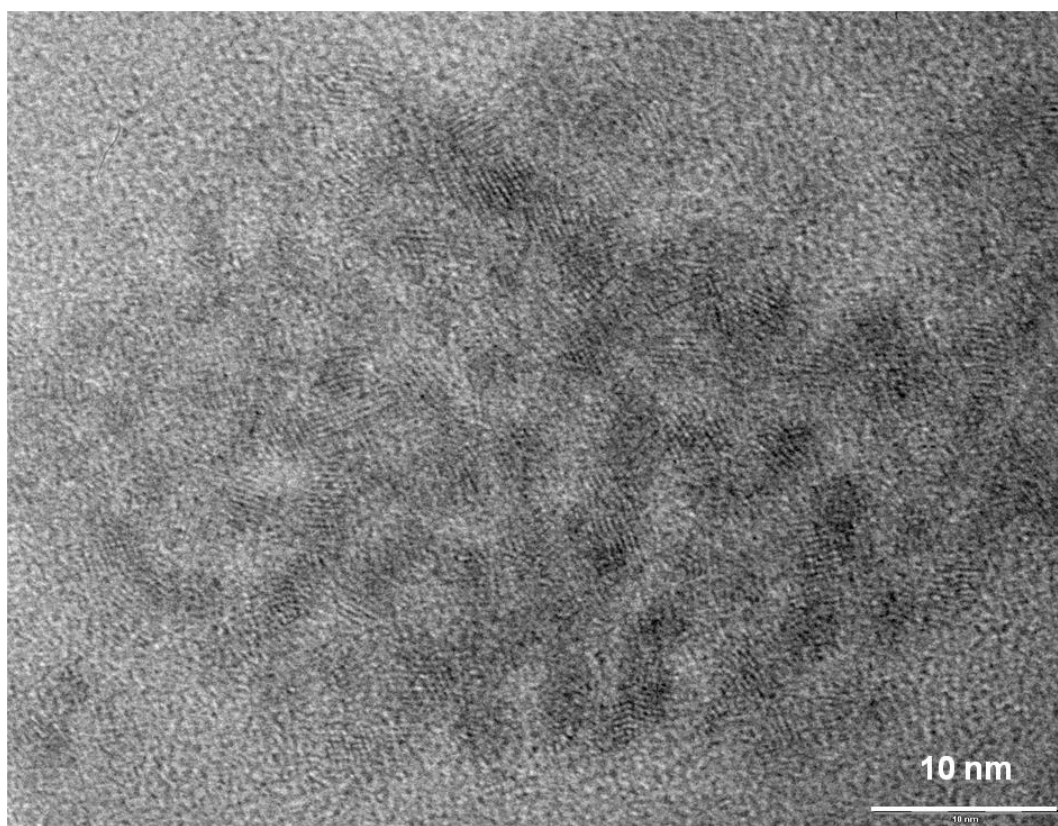

**Figure S3:** TEM image of **QD540**.

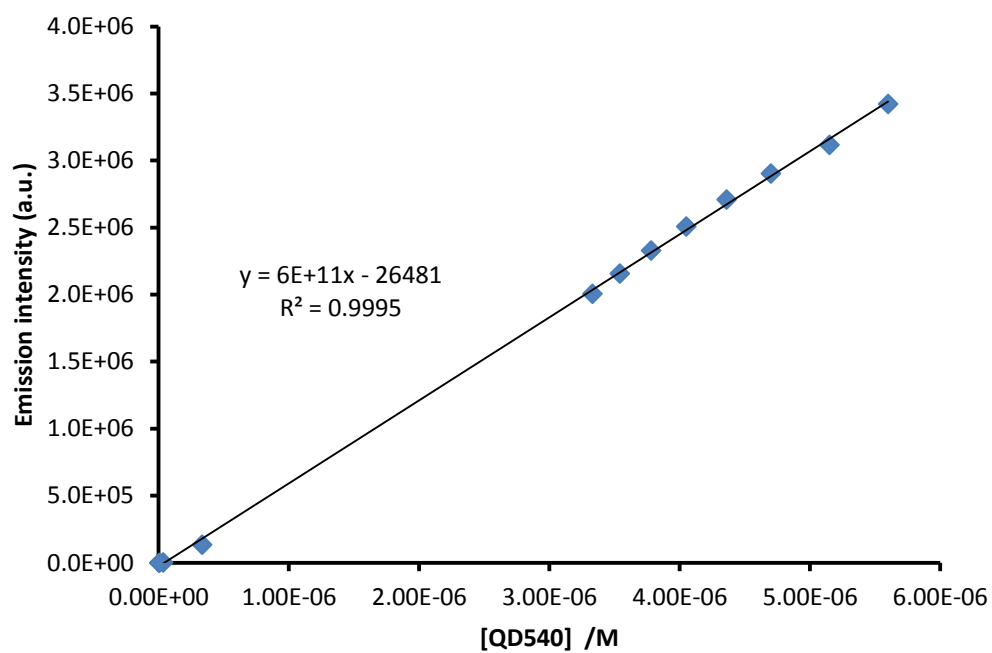

**Figure S4:** Emission intensity of **QD540** in TRIS/HCl 0.01M, pH 7.3 ( $\lambda_{\text{ex}} = 430 \text{ nm}$ ,  $\lambda_{\text{em}} = 540 \text{ nm}$ ) as a function of the concentration.

### Approximation of the area covered by the GSH from a space filing MM2 model (ChemBio3D Ultra):

The required space for one GSH molecule on the surface of the QD was estimated from a space-filling MM2 model, in which the surface of the CdTeS quantum dot was modelled as a CdS cluster. The area covered by the ligand was approximated modelled as a conical form, with maximum height  $z_{\max}$  and radius  $r$ .

$$z_{\max} = \sqrt{(a^2 - r^2)} = 9.59 \text{ \AA}$$
$$A_{\text{Ligand}} = \pi r^2 = 77.0 \text{ \AA}^2$$

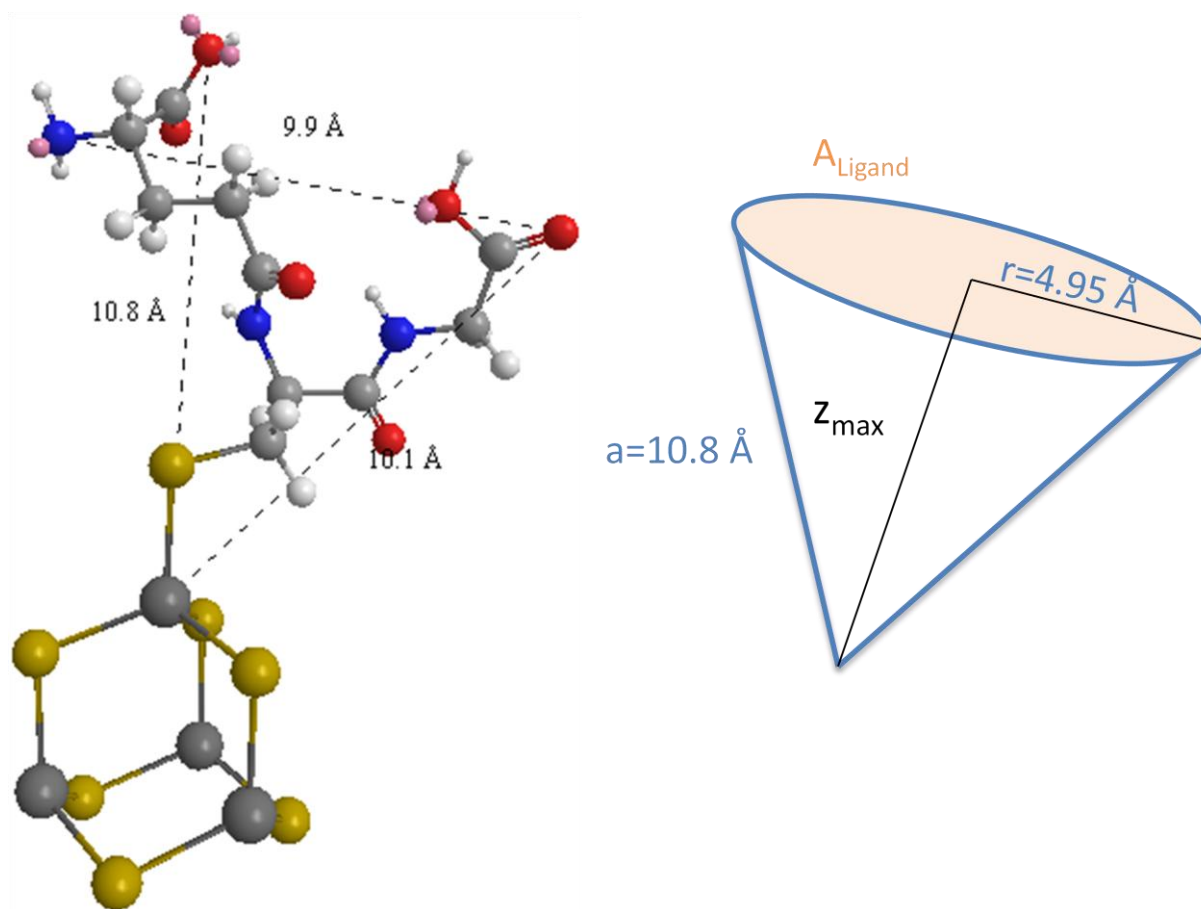

**Figure S5:** Approximation of the area covered by the GSH from a space filing MM2 model (ChemBio3D Ultra).

**Table S1** Optical properties as well as chemical formulae of the CdTe<sub>x</sub>S<sub>y</sub>-GSH QDs at seven different reaction times and the corresponding density ( $\rho$ ), diameters (D, Th = obtained from Equation 3 and Exp = measured by TEM), volumes (V), as well as their molecular weights: MW (total molecular weight), MW<sub>core</sub> (of the CdTe<sub>x</sub>S<sub>y</sub> core only) and total number of GSH per QD.

|                | Rq (%) | D <sub>Th</sub> (nm) | FWH<br>M | Em  | T (min) | V <sub>Th</sub> (nm <sup>3</sup> ) | $\rho$ (kg/m <sup>3</sup> ) | GSH (mmol) | Chemical Formula                                             | MW <sub>core</sub><br>(g/mol) | MW<br>(g/mol) |
|----------------|--------|----------------------|----------|-----|---------|------------------------------------|-----------------------------|------------|--------------------------------------------------------------|-------------------------------|---------------|
| <b>E107 3</b>  | 15.2   | 2.85                 | 55       | 555 | 60      | 12.1                               | 5.28                        | 1.55       | CdTe <sub>0.13</sub> S <sub>0.15</sub> (GSH) <sub>0.69</sub> | 38314                         | 99100         |
| <b>E107 5</b>  | 19.9   | 3.1                  | 61       | 575 | 120     | 15.6                               | 5.13                        | 1.41       | CdTe <sub>0.14</sub> S <sub>0.32</sub> (GSH) <sub>0.47</sub> | 48069                         | 97169         |
| <b>E107 7</b>  | 21.7   | 3.2                  | 62       | 591 | 180     | 17.1                               | 5.2                         | 1.35       | CdTe <sub>0.12</sub> S <sub>0.33</sub> (GSH) <sub>0.44</sub> | 53578                         | 107880        |
| <b>E107 8</b>  | 24.7   | 3.28                 | 64       | 601 | 210     | 18.5                               | 5.05                        | 1.03       | CdTe <sub>0.15</sub> S <sub>0.58</sub> (GSH) <sub>0.35</sub> | 56351                         | 95466         |
| <b>E107 9</b>  | 28     | 3.32                 | 69       | 612 | 270     | 19.2                               | 5.01                        | 0.92       | CdTe <sub>0.12</sub> S <sub>0.55</sub> (GSH) <sub>0.22</sub> | 57779                         | 86262         |
| <b>E107 10</b> | 25.7   | 3.35                 | 72       | 624 | 375     | 19.7                               | 5.01                        | 0.82       | CdTe <sub>0.11</sub> S <sub>0.54</sub> (GSH) <sub>0.21</sub> | 59435                         | 86868         |
| <b>E107 11</b> | 11.4   | 3.37                 | 77       | 647 | 435     | 20.03                              | 4.94                        | 0.31       | CdTe <sub>0.11</sub> S <sub>0.55</sub> (GSH) <sub>0.09</sub> | 59586                         | 71130         |

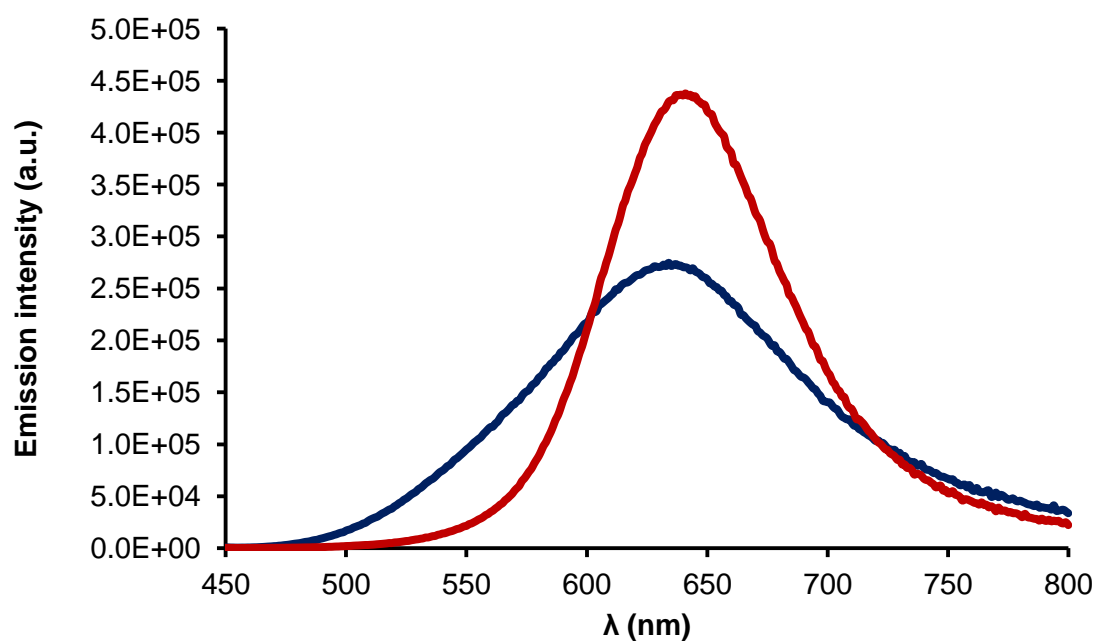

**Figure S6:** Emission spectra of quantum dots emitting at 636 nm before (blue) and after addition of GSH at room temperature (red, Citrate buffer, pH 8.5).

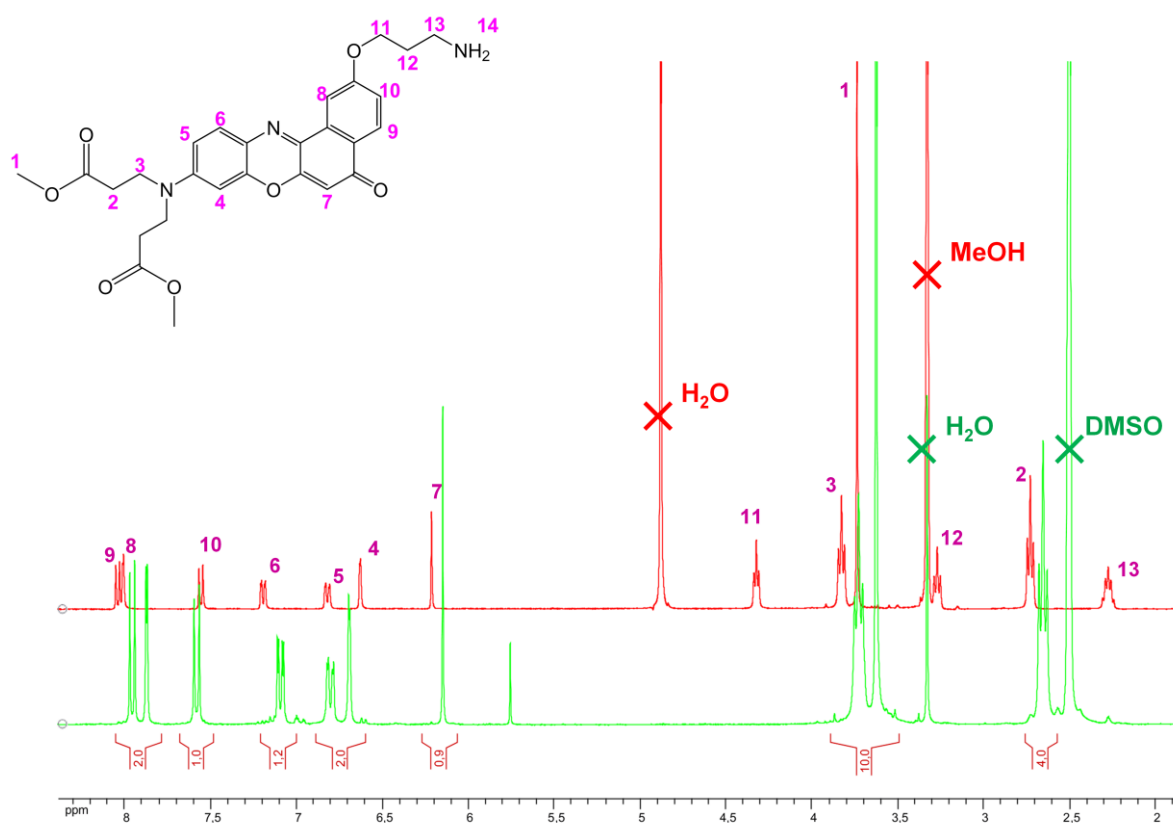

**Figure S7:**  $^1\text{H}$  NMR spectrum of functionalized Nile-Red dyes (**1** in  $d_6$ -DMSO, green and **3** in MeOD, red), 300 MHz.

### **Calculation of the Dye/QD ratios of QD-NR1, QD-NR2, QD-NR3, QD-NR4, QD-NR5, and QD-NR6 from their UV-absorption spectra:**

The UV-absorption spectra ( $A(\lambda)$ ) of the conjugated QDs have been fitted to a linear combination of the absorption of the Nile-Red ( $A_{NR}(\lambda)$ ) and of the QD540 ( $A_{QD}(\lambda)$ ):

$$A(\lambda) = a A_{NR}(\lambda) + b A_{QD}(\lambda)$$

The corresponding Dye and QD concentrations were obtained from the populations  $a$  and  $b$ , by taking into account the respective extinction coefficients, *i.e.* 16600 L. mol<sup>-1</sup>.cm<sup>-1</sup> for the dye at 535 nm and 70 130 L. mol<sup>-1</sup>.cm<sup>-1</sup> for the QD 540 at 400 nm.

Values are summarized in Table S1.

| <i>Sample</i> | <i>Eq.</i> | <i>b</i> | <i>a</i> | <i>[QD]</i> | <i>[NR]</i> | <i>[NR]/[QD]</i> |
|---------------|------------|----------|----------|-------------|-------------|------------------|
| <b>QD-NR1</b> | 5          | 1.68     | 0.18     | 9.60616E-06 | 7.67711E-06 | 0.79918599       |
| <b>QD-NR2</b> | 9          | 3.11     | 0.55     | 1.77828E-05 | 2.34578E-05 | 1.31912799       |
| <b>QD-NR3</b> | 13         | 2.5      | 0.49     | 1.42949E-05 | 2.08988E-05 | 1.46197756       |
| <b>QD-NR4</b> | 18         | 2.2      | 0.45     | 1.25795E-05 | 1.91928E-05 | 1.5257187        |
| <b>QD-NR5</b> | 23         | 2.16     | 0.46     | 1.23508E-05 | 1.96193E-05 | 1.58850548       |
| <b>QD-NR6</b> | 37         | 2.09     | 0.52     | 1.19505E-05 | 2.21783E-05 | 1.85584497       |

**Table S2:** Factors  $a$  and  $b$ , and corresponding NR and QD concentrations as well as NR/QD ratios for **QD-NR1**, **QD-NR2**, **QD-NR3**, **QD-NR4**, **QD-NR5**, and **QD-NR6** upon addition of 5 to 3 eq. of Nile-Red dye.

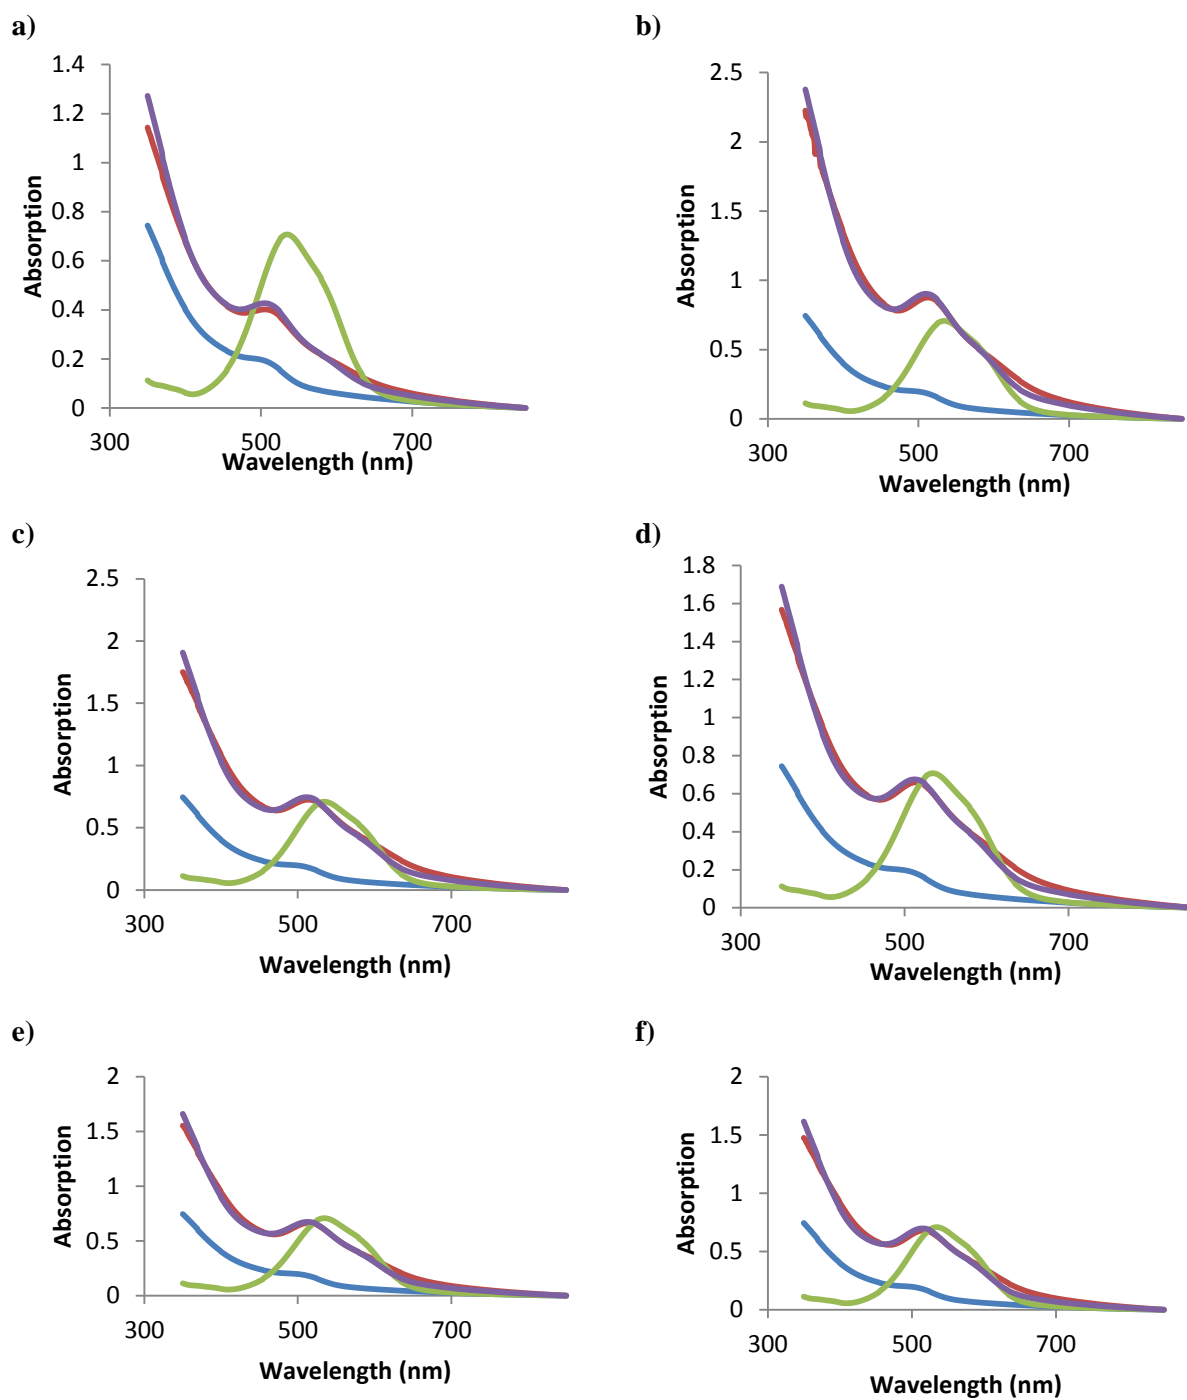

**Figure S8:** Experimental absorption spectra of Nile-red (green), **QD540** (blue) and for conjugated QDs (red) with increasing dye/QD molar ratio as well as calculated spectra (purple) : a) **QD-NR1**, b) **QD-NR2**, c) **QD-NR3**, d) **QD-NR4**, e) **QD-NR5**, and f) **QD-NR6**.

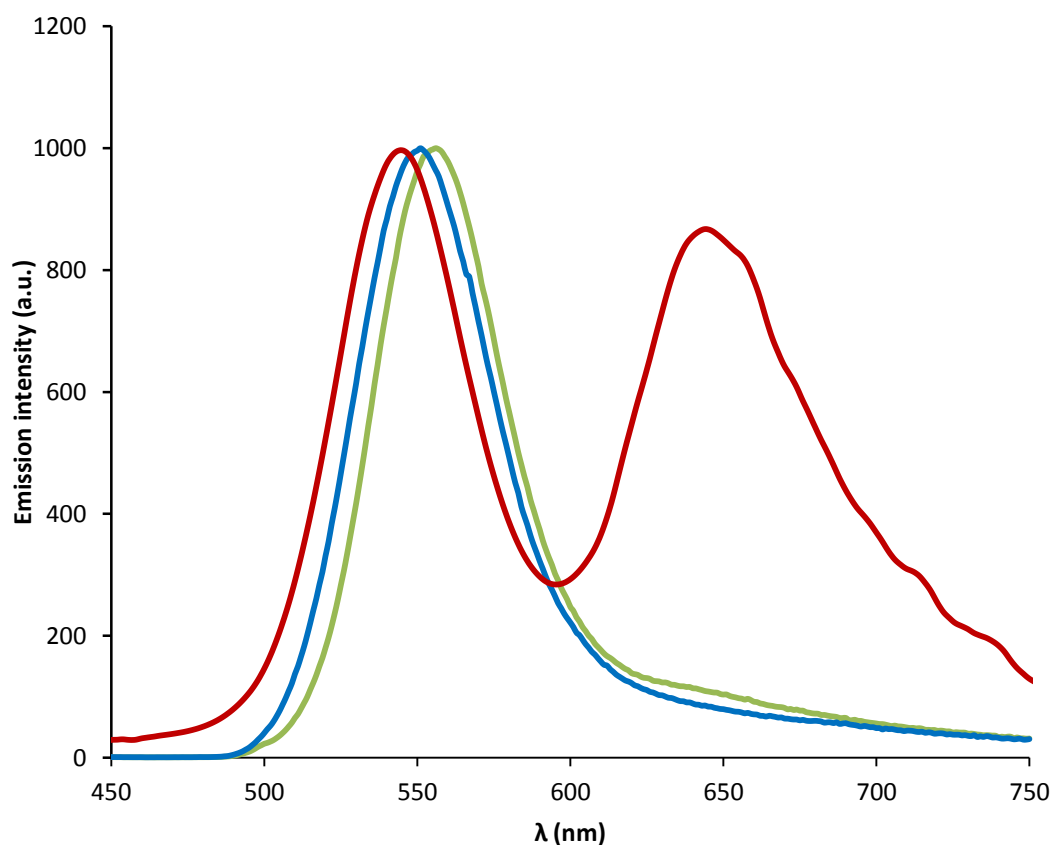

**Figure S9:** Normalized emission spectra of unconjugated QDs in absence of Nile-Red (blue), after mixing with of 23 equivalents of Nile-Red (green) and of conjugated QDs (NR/QD = 2.40, red), 0.01 M TRIS-HCl pH 7.4,  $\lambda_{\text{ex}} = 375$  nm.

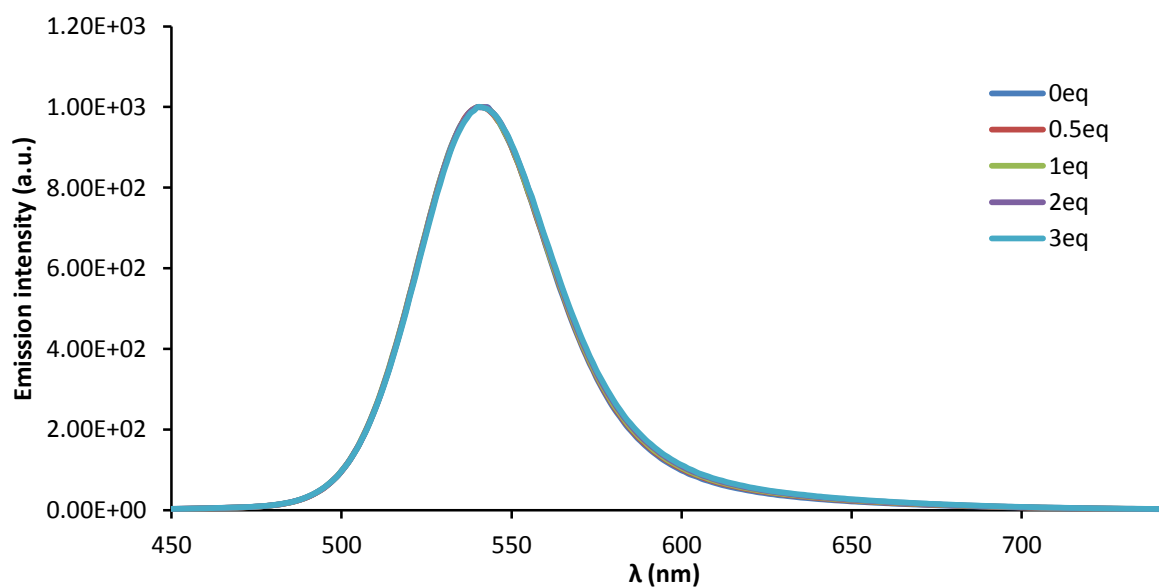

**Figure S10:** Normalized emission spectra of **QD540** (blue) and after mixing with of 0, 0.5, 1,2 and 3 equivalents of Nile-Red in 0.01 M TRIS-HCl pH 7.4,  $\lambda_{\text{ex}} = 375$  nm.

## **Background FRET theory and equations**

The overlap integral  $J(\lambda)$  between the QDs emission spectrum and the Nile Red absorption spectrum has been calculated according to Equation (S1) and amounts to  $1.27 \times 10^{15} \text{ M}^{-1} \text{ cm}^{-1} \text{ nm}^4$ :

$$J(\lambda) = \int_0^\infty F_D(\lambda) \varepsilon_A(\lambda) \lambda^4 d\lambda \quad (\text{S1})$$

where  $F_D(\lambda)$  is the normalized emission of the donor (QD) and  $\varepsilon_A(\lambda)$  is the absorption coefficient of the acceptor (Nile Red) at wavelength  $\lambda$ .

The Förster radius  $R_0$  (nm), *ie.* the distance at which the efficiency of the FRET is 50%, could be calculated from the value of  $J(\lambda)$  and from the value of the NHS-activated QDs (**QD540** in presence of NHS/EDCI) quantum yield ( $\phi_D = 0.24$ ) by Equation (S2):

$$R_0^6 = 8.79 \times 10^{-5} n_r^{-4} \phi_D \chi^2 J(\lambda) \quad (\text{S2})$$

where  $\phi_D$  is the quantum yield of the donor in the absence of acceptor,  $\chi^2$  is the orientation factor of the donor and acceptor dipoles (assumed to be equal to 2/3 in the case of dynamic averaging of the donor and acceptor dipoles within the donor lifetime),<sup>1</sup>  $n_r$  is the refractive index of the solution (e.g.,  $n_r = 1.33$  for water),  $N_{Av}$  is Avogadro's number.

The energy transfer efficiencies have been calculated from the variations of the intensity of the QDs according to Equation (S3):

$$E_{FRET} = 1 - \frac{I_{DA}}{I_D} \quad (\text{S3})$$

where  $I$  are the intensities ( $I$ ) of the donor in absence of acceptor ( $X_D$ ) and for the donor-acceptor pair ( $X_{DA}$ ).

The distance between the donor and the acceptor,  $r$  can be obtained from Equation (S4):

$$E_{FRET} = \frac{nR_0^6}{nR_0^6 + r^6} \quad (\text{S4})$$

for  $n$  donor-acceptor pairs with a Förster radius  $R_0$  separated by a distance  $r$ .

---

<sup>1</sup> J.R. Lakowicz, *Principles of Fluorescence Spectroscopy*, Kluwer Academic/Plenum, New York, NY, USA, 2<sup>nd</sup> edition 1999.

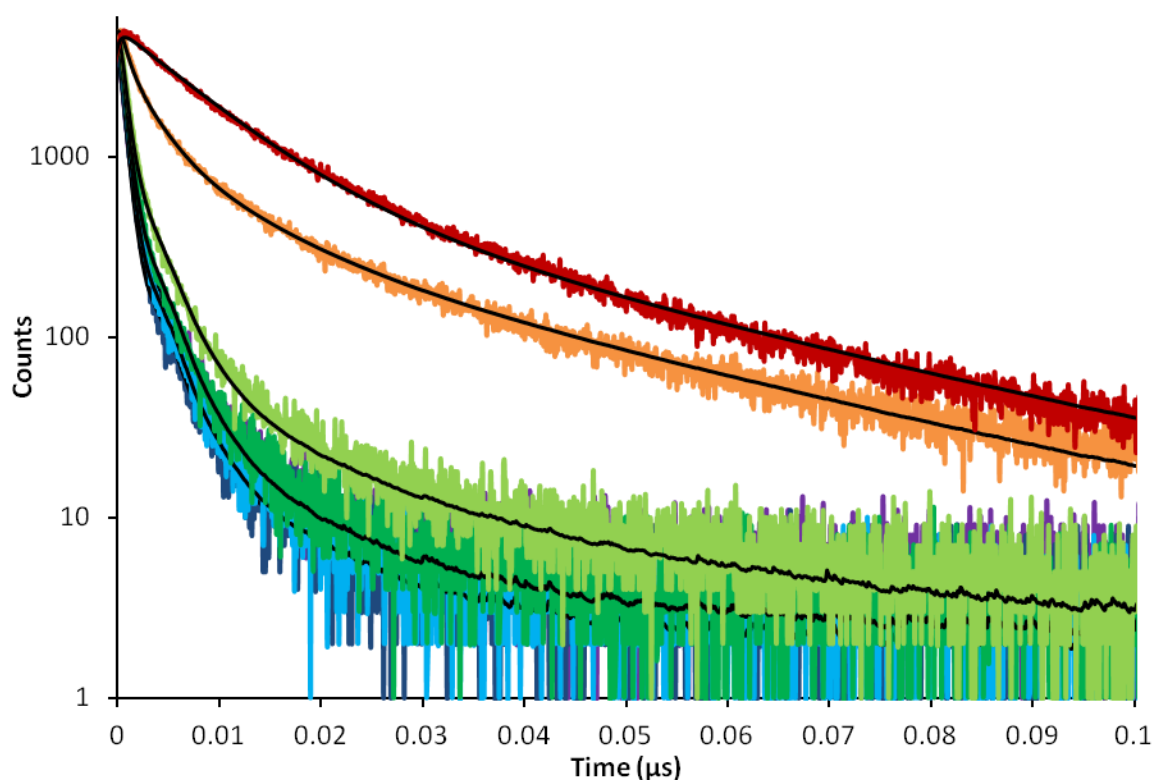

**Figure S11:** Time-resolved luminescence decay profiles of unconjugated (—), and of conjugated QDs with increasing dye/QD molar ratios (QD-NR1, —, QD-NR2, —, QD-NR3, —, QD-NR4, —, QD-NR5, —, QD-NR6, —) and corresponding tetra-exponential fits. 0.01 M TRIS-HCl pH 7.4,  $\lambda_{\text{ex}}=370$  nm and  $\lambda_{\text{em}}=540$  nm.

| Sample | $\tau_1$ (ns) | $\tau_2$ (ns) | $\tau_3$ (ns) | $\tau_4$ (ns) | $\alpha_1$ (%) | $\alpha_2$ (%) | $\alpha_3$ (%) | $\alpha_4$ (%) | $\langle\tau\rangle$ (ns) |
|--------|---------------|---------------|---------------|---------------|----------------|----------------|----------------|----------------|---------------------------|
| QD542  | 5             | 15            | 49            | 0             | 29.7           | 53.4           | 16.9           | 0              | 18                        |
| QD-NR1 | 4             | 13            | 47            | 0.8*          | 26.3           | 33.2           | 23.7           | 16.8           | 17                        |
| QD-NR2 | 1             | 6             | 30            | 0.5*          | 28.6           | 11.9           | 5.2            | 54.3           | 3                         |
| QD-NR3 | 2             | 5             | 21            | 0.4*          | 21.0           | 10.3           | 2.7            | 66.0           | 2                         |
| QD-NR4 | 1             | 5             | 25            | 0.3*          | 21.6           | 8.8            | 1.6            | 68.0           | 1                         |
| QD-NR5 | 0.4*          | 2             | 9             | 0             | 76.2           | 18.0           | 5.8            | 0              | 1                         |
| QD-NR6 | 0.4*          | 2             | 10            | 0             | 77.0           | 18.9           | 4.1            | 0              | 1                         |

\*These values are given as an indication of the fitting and the estimated error is around 1 ns.

**Table S3:** Decay parameters for CdTe<sub>x</sub>S<sub>y</sub> QDs with increasing dye/QD molar ratios obtained from time-resolved studies in 0.01 M TRIS-HCl pH 7.4,  $\lambda_{\text{ex}}=370$  nm and  $\lambda_{\text{em}}=540$  nm.

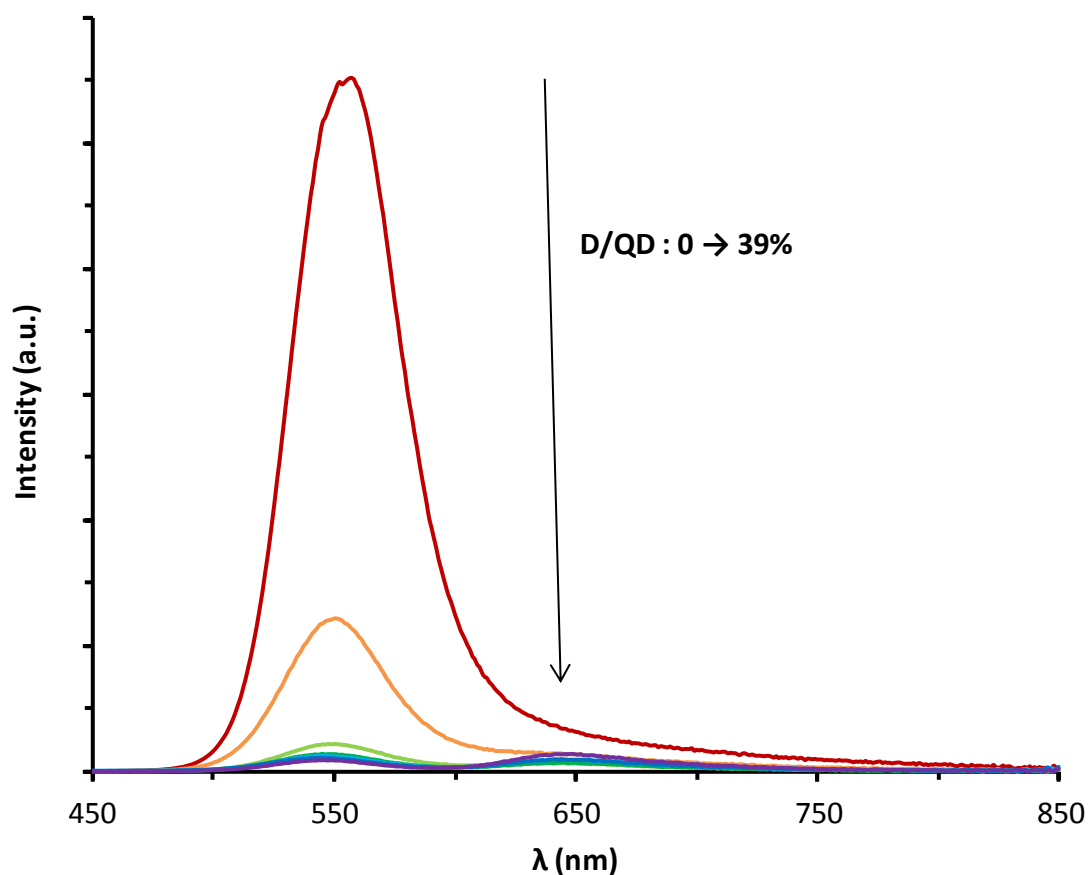

**Figure S12:** Emission spectra of unconjugated (—), and of conjugated QDs with increasing dye/QD molar ratios (QD-NR1, —, QD-NR2, —, QD-NR3, —, QD-NR4, —, QD-NR5, —, QD-NR6, —), 0.01 M TRIS-HCl pH 7.4,  $\lambda_{\text{ex}} = 375$  nm.

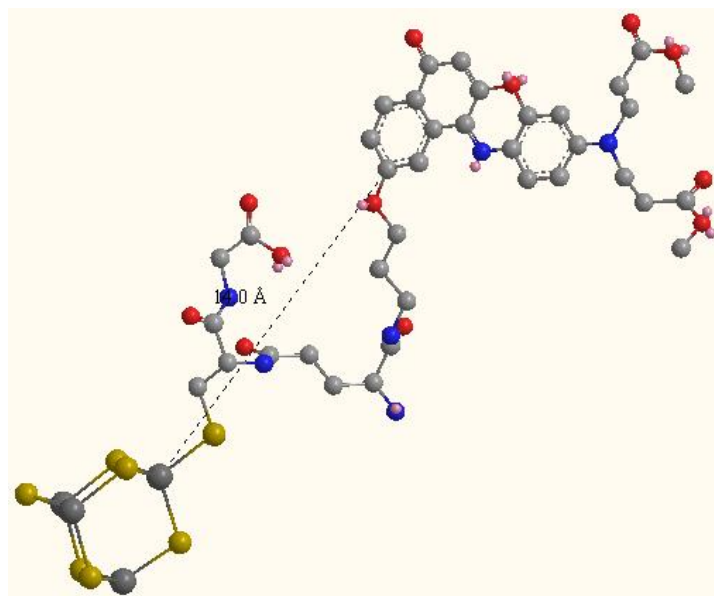

**Figure S13:** Space filling MM2 model of conjugated QD with a Nile-Red molecule (ChemBio3D Ultra)
